# Supplementary material
Source: ML conference proceedings conference paper supplement (https://openaccess.thecvf.com/content/CVPR2023/html/Dave_TimeBalance_Temporally-Invariant_and_CVPR_2023_paper.html)
Supplement: Supplementary file 1 [file Dave_TimeBalance_Temporally-Invariant_and_CVPR_2023_supplemental.pdf]

# Supplementary Material:

## TimeBalance: Temporally-Invariant and Temporally-Distinctive Video Representations for Semi-Supervised Action Recognition

Ishan Rajendrakumar Dave, Mamshad Nayeem Rizve, Chen Chen, Mubarak Shah  
Center for Research in Computer Vision, University of Central Florida, Orlando, USA  
{ishandave, nayeemrizve}@knights.ucf.edu, {chen.chen, shah}@crcv.ucf.edu

### A. Overview

- Section **B**: Implementation details about network architectures and training setup.
- Section **C**: Ablation study for our framework.
- Section **D**: Supportive diagrams and explanation for our method.

### B. Implementation Details

#### B.1. Network Architecture

##### B.1.1 Backbone

For teacher models  $f_I$  and  $f_D$ , we utilize 3D-ResNet50 model from the implementation of `Slow-R50` [2] of official PyTorchVideo<sup>1</sup>. For experiments with 3D-ResNet18, we utilize its official PyTorch implementation `r3d_l18`<sup>2</sup>.

##### B.1.2 Non-Linear Projection Head

We use non-linear projection head  $g(\cdot)$  during the self-supervised pretraining of temporally-invariant and temporally-distinctive teachers to reduce the dimensions of the representation. We utilize Multi-layer Perceptron (MLP) as a non-linear projection head to project 2048-dimensional model features to 128-dimensional vectors in normalized representation space. The design of MLP is as follows, where `nn` indicates `torch.nn` PyTorch package:

```
nn.Linear(2048, 512, bias = True)
nn.BatchNorm1d(512)
nn.ReLU(inplace=True)
nn.Linear(512, 128, bias = False)
nn.BatchNorm1d(128)
```

<sup>1</sup><https://github.com/facebookresearch/pytorchvideo>

<sup>2</sup><https://github.com/pytorch/vision/blob/main/torchvision/models/video>

### B.2. Training Details

For all weight updates, we utilize Adam Optimizer [3] with default parameters  $\beta_1 = 0.9$  and  $\beta_2 = 0.999$  with a base learning rate ( $\alpha_I, \alpha_D, \alpha_S$ ) of  $1e-3$ . For all training, we utilize a linear warmup of 10 epochs. A patience-based learning rate scheduler is also used, which drops the learning rate to its half value on a loss plateau.

### C. Additional Ablations

#### C.1. Loss function for teacher supervision

In order to distill teacher knowledge, we study three different loss functions as  $\mathcal{L}_{unsup}$  and report the results in Table 1. For these experiments, we use 3D-Resnet50 as the student model on the UCF101 dataset [4]. We observe that all three losses perform reasonably while  $\mathcal{L}_2$  performs the best, which we use as the default loss in our method.

| Unlabeled Supervision | UCF101 % Labels |       |       |
|-----------------------|-----------------|-------|-------|
|                       | 5%              | 20%   | 50%   |
| $\mathcal{L}_2$       | 53.48           | 83.15 | 85.02 |
| KL-Divergence         | 52.62           | 82.76 | 84.50 |
| JS-Divergence         | 50.91           | 82.10 | 83.94 |

Table 1. Ablation of different Teacher Losses.  $\mathcal{L}_2$  distillation loss performs the best, which we use in our default setting.

#### C.2. Student $f_S$ from Scratch

We perform experiments with student from random initialization and compare them with the prior methods in Table 2.

### D. Method

#### D.1. Loss for Labeled and Unlabeled set

In Fig. 1, we show the handling of labeled and unlabeled data in the semi-supervised training of student  $f_S$ . For la-

|                        | Backbone | UCF101      |              | HMDB         |              | Kinetics    |
|------------------------|----------|-------------|--------------|--------------|--------------|-------------|
|                        |          | 5%          | 20%          | 40%          | 60%          | 10%         |
| Prior best methods     | R3D-50   | 27.0 [7]    | 51.7 [7]     | 32.9 [7]     | 38.9         | 58.4 [6]    |
| Ours (scratch student) | R3D-50   | 53.1(+26.1) | 83.0 (+31.3) | 52.1 (+19.2) | 54.3 (+15.4) | 60.8 (+2.4) |
| Prior best methods     | R3D-18   | 44.8 [5]    | 76.1 [5]     | 46.5 [5]     | 49.7 [5]     | 53.7 [6]    |
| Ours (scratch student) | R3D-18   | 46.7 (+1.9) | 78.2 (+2.1)  | 49.1 (+2.6)  | 52.9 (+3.2)  | 54.4 (+0.7) |

Table 2. Experiments with Student trained from Random Initialization. (+n) shows absolute improvement over the prior best work

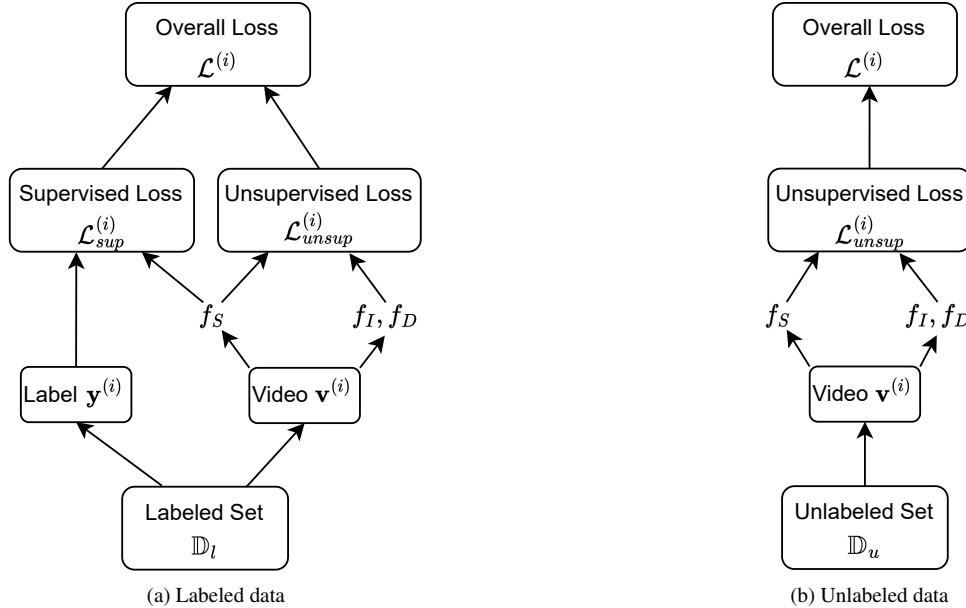

Figure 1. Loss computations in labeled and unlabeled data. (a) In case of Labeled data, the student  $f_S$  gets supervision from supervised cross-entropy loss from label  $\mathbf{y}^{(i)}$  and unsupervised  $\mathcal{L}_2$  loss from teachers. (b) For unlabeled set, the student is only trained with the unsupervised loss from teachers. Details are in Sec 3.2 of the main paper.

beled data  $\mathbb{D}_l$ , the student model has two sources of supervision: (1) Labeled supervision  $\mathcal{L}_{sup}^{(i)}$  in the form of standard cross entropy loss which is computed from the student’s prediction and given class label  $\mathbf{y}^{(i)}$  (2) Unlabeled supervision  $\mathcal{L}_{unsup}^{(i)}$  in the form of  $\mathcal{L}_2$  distillation loss computed from the weighted average of predictions of teachers ( $f_D$  and  $f_I$ ). For the unlabeled set  $\mathbb{D}_u$ , the student model gets supervision only in the form of  $\mathcal{L}_2$  distillation loss.

## D.2. Temporally-Distinctive pretraining using unpooled features

Since  $\mathcal{L}_{D1}$  deals with temporally-pooled(averaged) features, it promotes temporal-distinctiveness for the *pooled* features. Similar to that, [1] designs a contrastive objective that promotes temporally-distinctive representation on the *unpooled* features. We call it unpooled temporal-distinctive objective  $\mathcal{L}_{D2}$ , which is illustrated in Fig. 2.

## References

- [1] Ishan Dave, Rohit Gupta, Mamshad Nayeem Rizve, and Mubarak Shah. Tclr: Temporal contrastive learning for video representation. *Computer Vision and Image Understanding*, page 103406, 2022. 2
- [2] Christoph Feichtenhofer, Haoqi Fan, Jitendra Malik, and Kaiming He. Slowfast networks for video recognition. In *Proceedings of the IEEE international conference on computer vision*, pages 6202–6211, 2019. 1
- [3] Diederik P. Kingma and Jimmy Ba. Adam: A method for stochastic optimization. In Yoshua Bengio and Yann LeCun, editors, *3rd International Conference on Learning Representations, ICLR 2015, San Diego, CA, USA, May 7-9, 2015, Conference Track Proceedings*, 2015. 1
- [4] Khurram Soomro, Amir Roshan Zamir, and Mubarak Shah. Ucf101: A dataset of 101 human actions classes from videos in the wild. *arXiv preprint arXiv:1212.0402*, 2012. 1
- [5] Junfei Xiao, Longlong Jing, Lin Zhang, Ju He, Qi She, Zongwei Zhou, Alan Yuille, and Yingwei Li. Learning from temporal gradient for semi-supervised action recognition. In *Pro-*

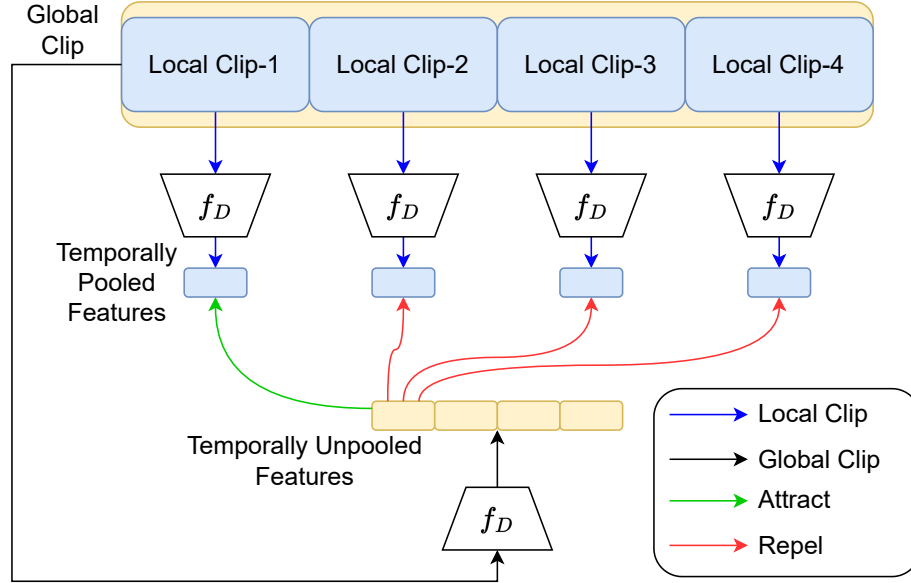

Figure 2. **Temporally-Distinctive Contrastive Objective for Temporally-unpooled features**  $\mathcal{L}_{D2}$ : A time-duration of the video can be represented in two different ways: (1) Pooled features of the short(local) clip (2) Unpooled feature slice of the long(global) clip. In this contrastive objective, we maximize the agreement between *temporally-aligned* pooled and unpooled features.

*ceedings of the IEEE/CVF Conference on Computer Vision and Pattern Recognition*, pages 3252–3262, 2022. 2

[6] Yinghao Xu, Fangyun Wei, Xiao Sun, Ceyuan Yang, Yujun Shen, Bo Dai, Bolei Zhou, and Stephen Lin. Cross-model pseudo-labeling for semi-supervised action recognition. In

*Proceedings of the IEEE/CVF Conference on Computer Vision and Pattern Recognition*, pages 2959–2968, 2022. 2

[7] Yuliang Zou, Jinwoo Choi, Qitong Wang, and Jia-Bin Huang. Learning representational invariances for data-efficient action recognition. *arXiv preprint arXiv:2103.16565*, 2021. 2
